# Supplementary material for: Platelets Count During Circulatory Assistance: Involvement in the Changes of Oxygenation Membrane
Source: Research Square preprint supplement (doi:10.21203/rs.3.rs-104394/v1), 2020-11-13
Supplement: Supplementary file 1 [file 8df5eef452d6827c9a31b8bd.docx]

**Title: Platelets count during circulatory assistance: Involvement in the changes of oxygenation membrane**

**Authors**:

- (Corresponding author) Alaa Azhari, MD, Department of Cardiovascular Surgery, CHU Gabriel Montpied, 63003 Clermont-Ferrand, France. Dr.alaa.azhari@gmail.com
- Adama Sawadogo, MD, Department of Cardiovascular Surgery, CHU Gabriel Montpied, 63003 Clermont-Ferrand, France.
- Nicolas D’Ostrevy, MD, Department of Cardiovascular Surgery, CHU Gabriel Montpied, 63003 Clermont-Ferrand, France.
- Celine Lambert, MSc, Biostatistics Unit, CHU Gabriel Montpied, 63003 Clermont-Ferrand, France.
- Bruno Pereira, PhD, Biostatistics Unit, CHU Gabriel Montpied, 63003 Clermont-Ferrand, France.
- Kasara Azarnoush, MD PhD, Department of Cardiovascular Surgery, CHU Gabriel Montpied, 63003 Clermont-Ferrand, France.
- Lionel Camilleri, MD PhD, Department of Cardiovascular Surgery, CHU Gabriel Montpied, 63003 Clermont-Ferrand, France. Institut Pascal - UMR 6602 UCA/CNRS/SIGMA T.G.I.

Corresponding author: Alaa Azhari, MD. Praticien Hospitalier. CHU Clermont-Ferrand, Pôle Médecine Périopératoire, Chirurgie Cardio-Vasculaire, F-63003 Clermont-Ferrand, France. Telephone: +966500114443.

E-mail: Dr.Alaa.Azhari@gmail.com

**Declarations of interest**: none.

**Key Words:** Platelets, Membrane oxygenation, ECMO, ECLS, SAVE score, RESP score, Cardiac surgery.
